# Supplementary material
Source: Research Square preprint supplement (doi:10.21203/rs.3.rs-9954973/v1)
Supplement: Supplementary file 1 [file 32bc9ab3f1f9e880d596bca1.docx]

Spatial–Electronic Synergy of Frustrated Lewis Pairs for High‑Selectivity Gas Sensing

Feiyu Zhang1, Wenxue Wang1, Xudong Liang1, Dajian Wang1, Yuhang Yao1, Jiayu Li*2, Ruiqin Gao*3, Lei Shi*4, Guo-Dong Li*1

1 State Key Laboratory of Inorganic Synthesis and Preparative Chemistry, College of Chemistry, Jilin University, Changchun, 130012, P.R. China.

2 School of Energy and Materials, Shihezi University, Shihezi, 832000, P.R. China.

3 School of Biological and Chemical Engineering, NingboTech University, Ningbo, 315100, P.R. China.

4 School of Materials Science and Engineering, NingboTech University, Ningbo 315100, P.R. China

e-mail: jiayu22@shzu.edu.cn; gaorq@nbt.edu.cn; shiileii@163.com; lgd@jlu.edu.cn;





**Figure S1.** XRD patterns of pure ZnO and the series of GZO samples.


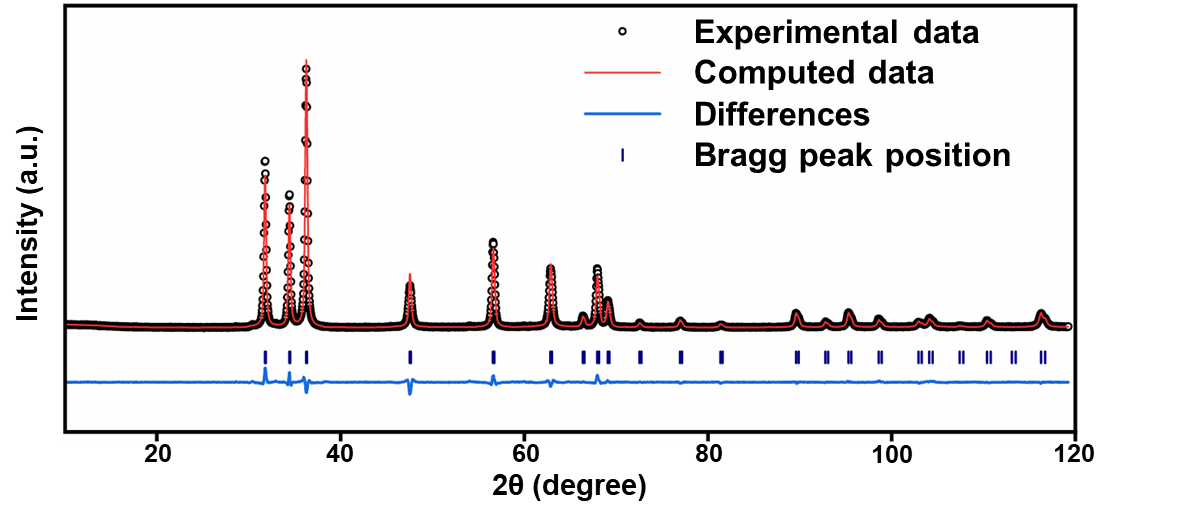


**Figure S2.** Rietveld refinement results of the XRD pattern for ZnO.


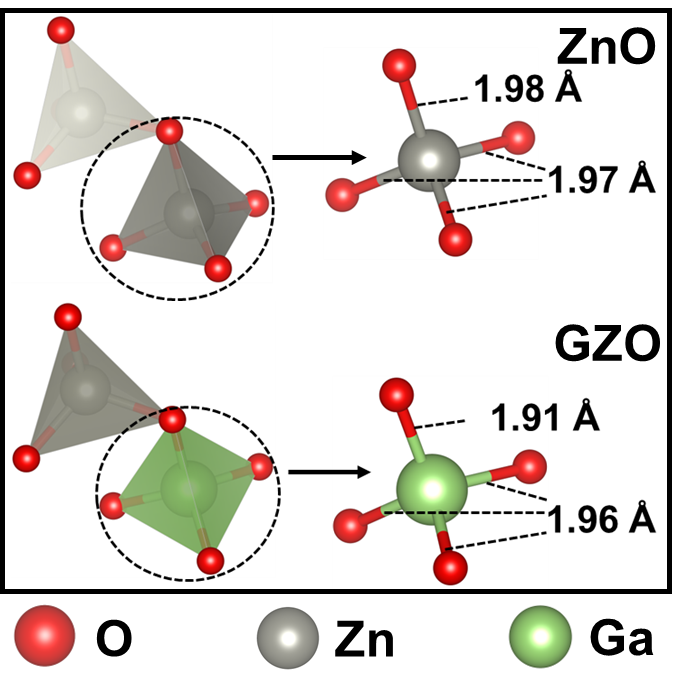


**Figure S3.** Local structures and bond lengths of ZnO and GZO, showing Zn-O and Ga-O bond lengths in the figure.


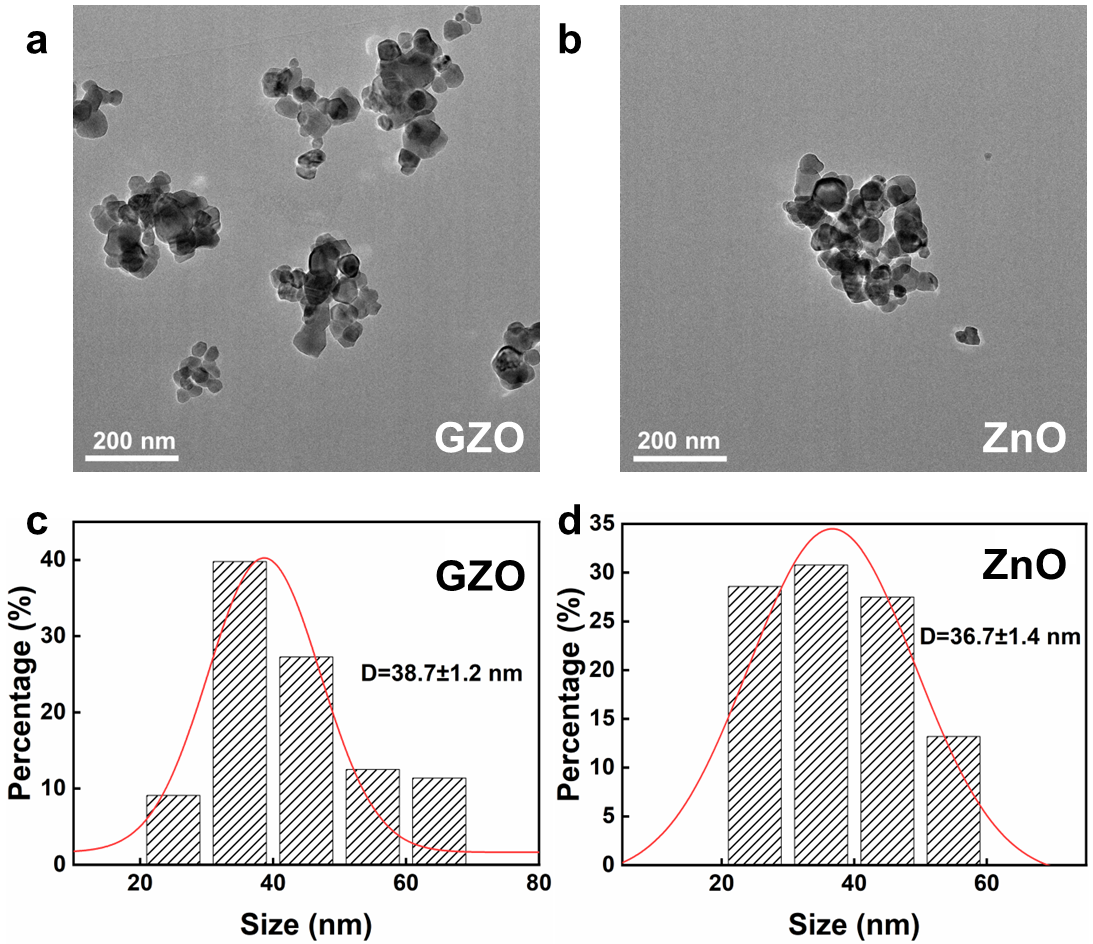


**Figure S4.** Typical TEM morphology images for (a) GZO and (b) ZnO, and particle size distribution statistics for (c) GZO and (d) ZnO.


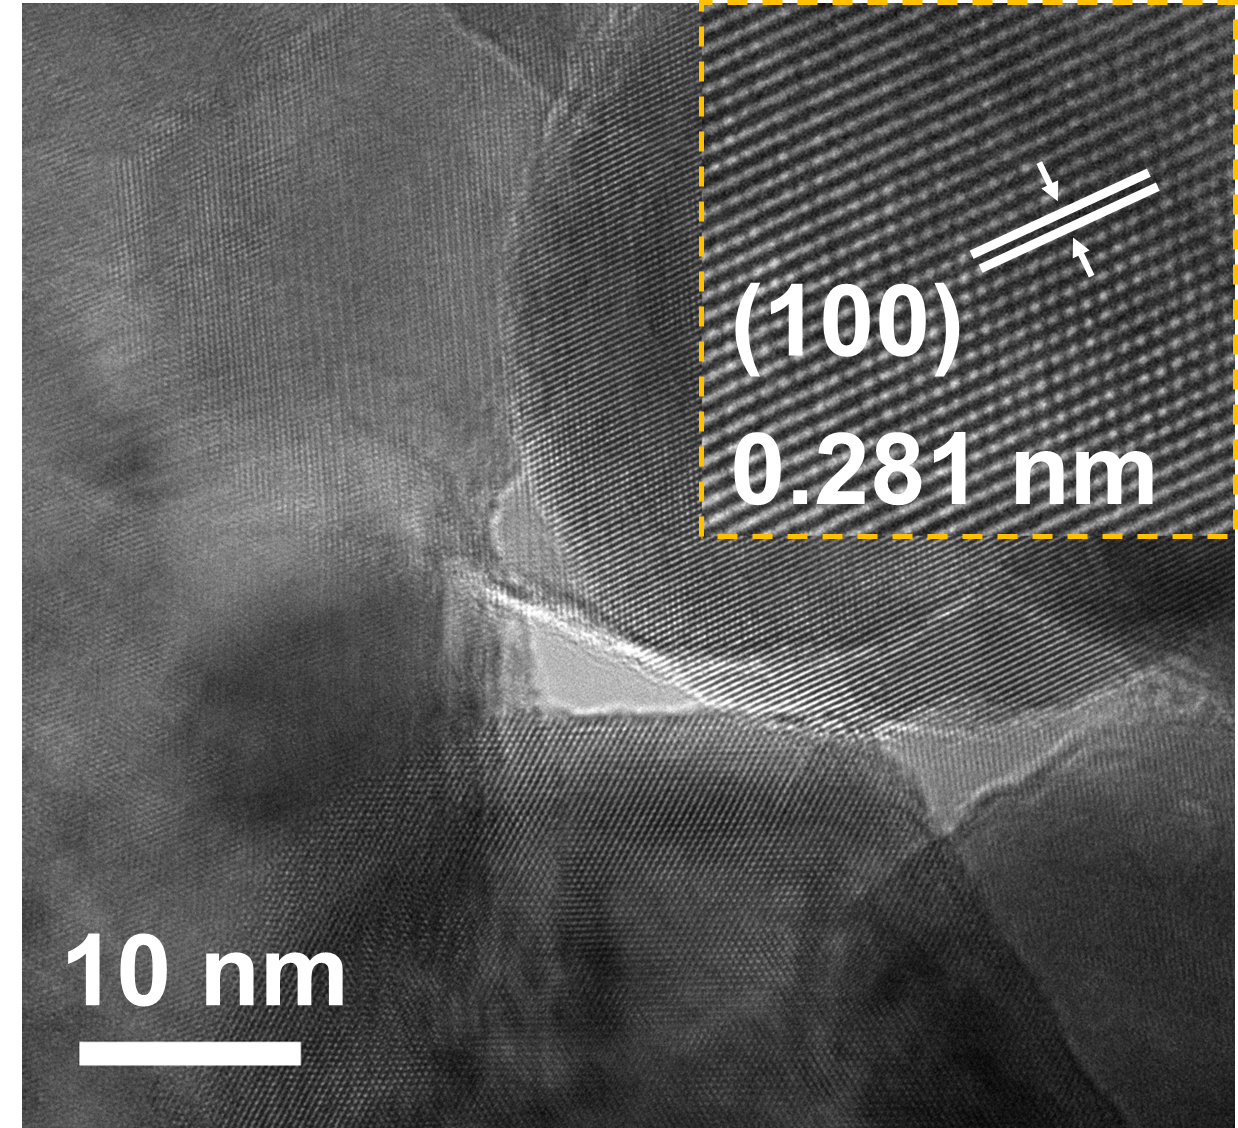


**Figure S5.** High-resolution TEM image of ZnO.


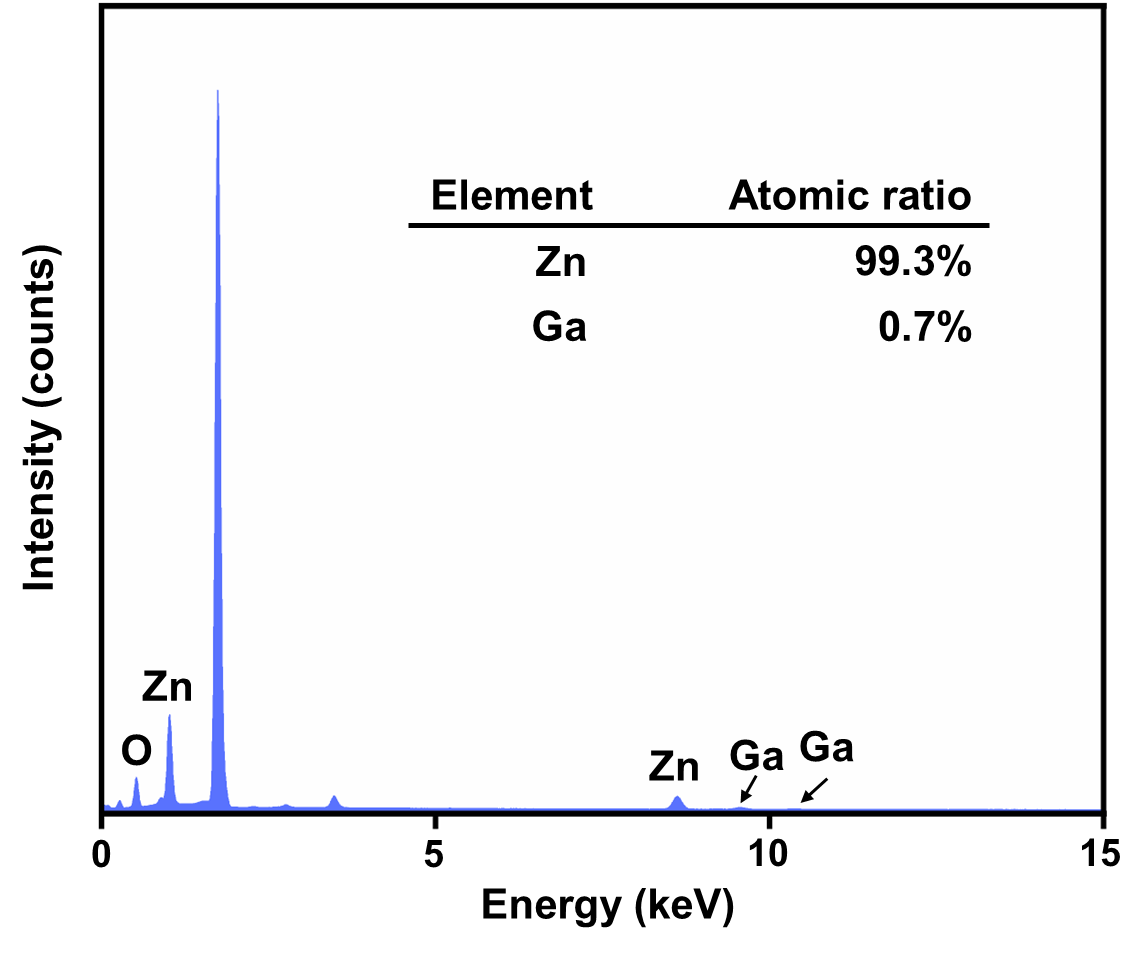


**Figure S6.** Quantitative analysis results of the EDS spectrum for GZO.


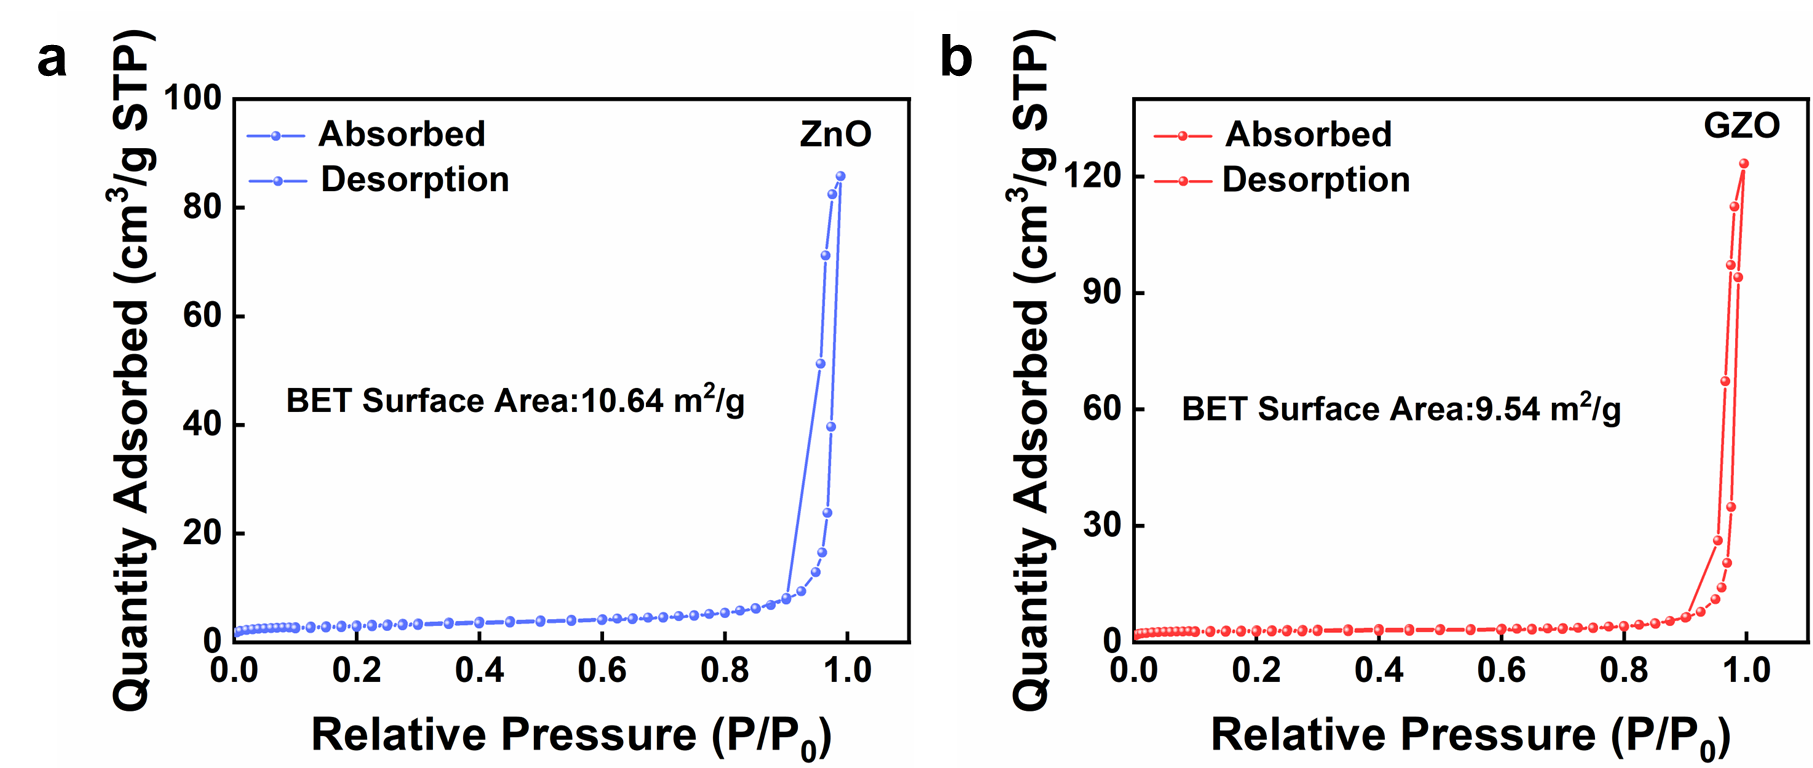


**Figure S7.** N2 adsorption-desorption isotherms and pore size distribution for (a) ZnO and (b) GZO.


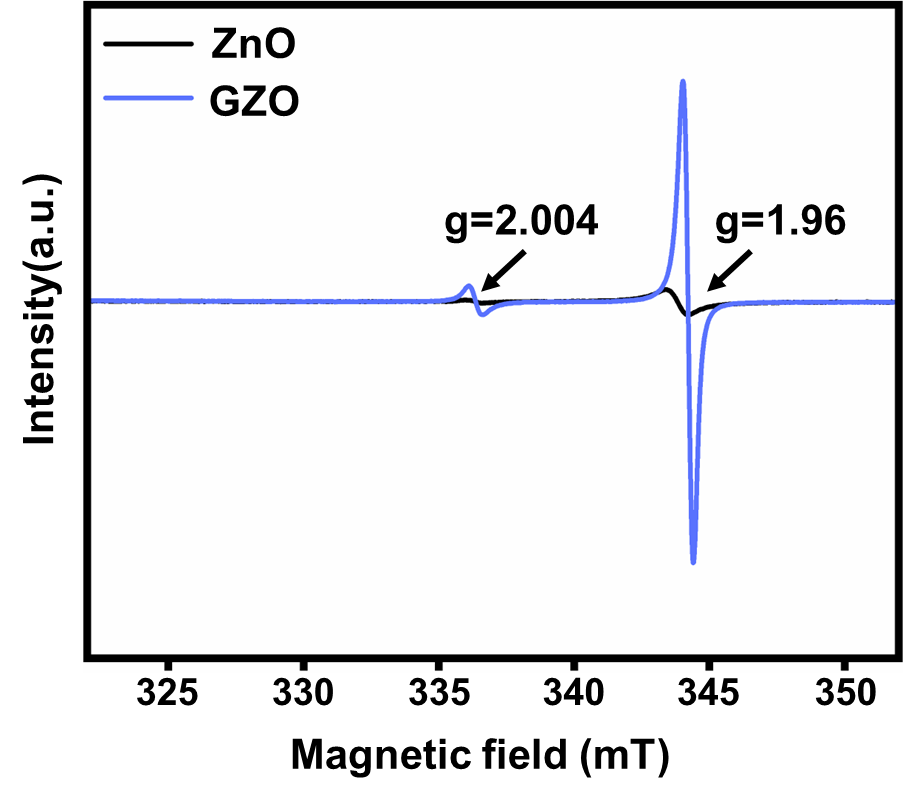


**Figure S8.** EPR spectra of ZnO and GZO.


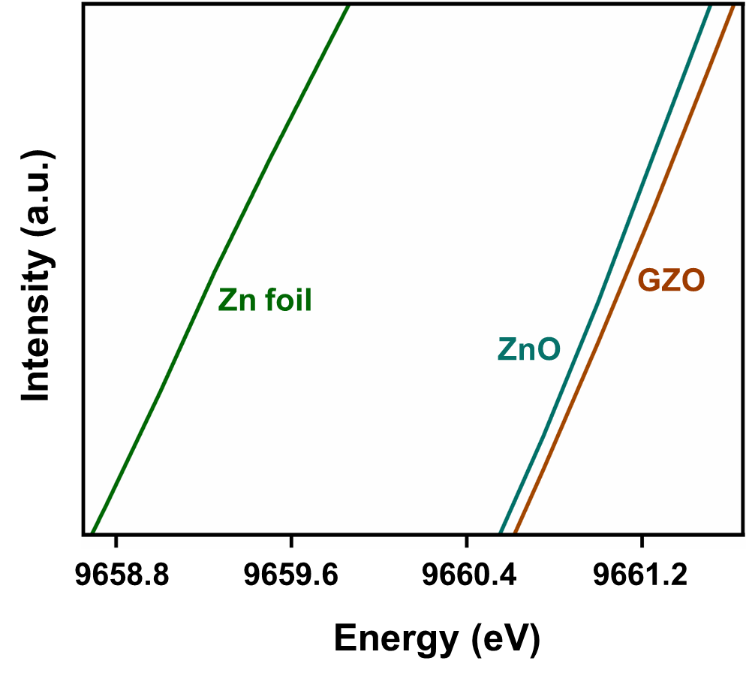


**Figure S9.** Comparison of Zn K-edge XANES absorption edge energies.


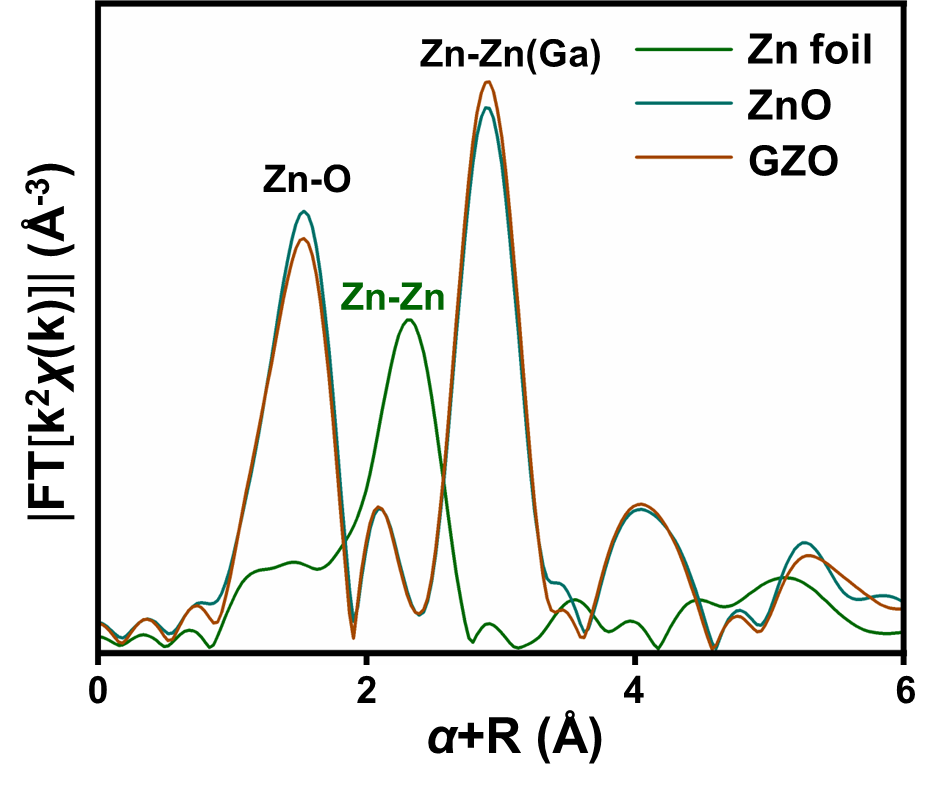


**Figure S10.** Fourier-transformed EXAFS spectra of ZnO and GZO.


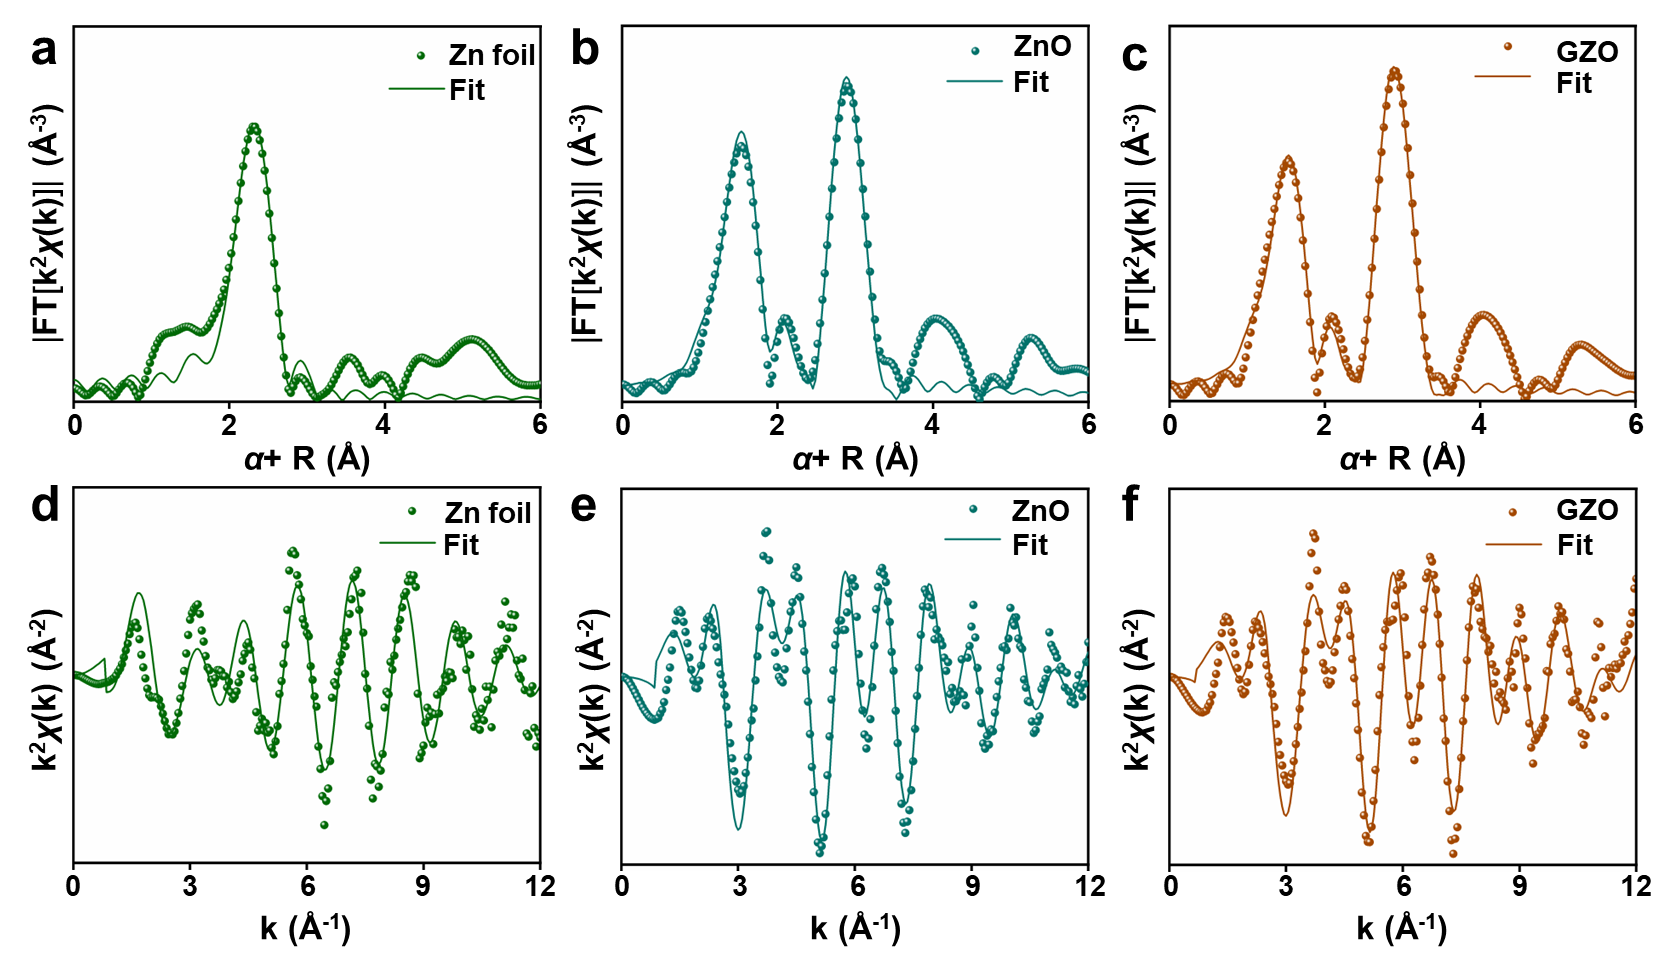


**Figure S11.** Fitting results of the EXAFS oscillation curves for (a,d) Zn foil, (b,e) ZnO, and (c,f) GZO.


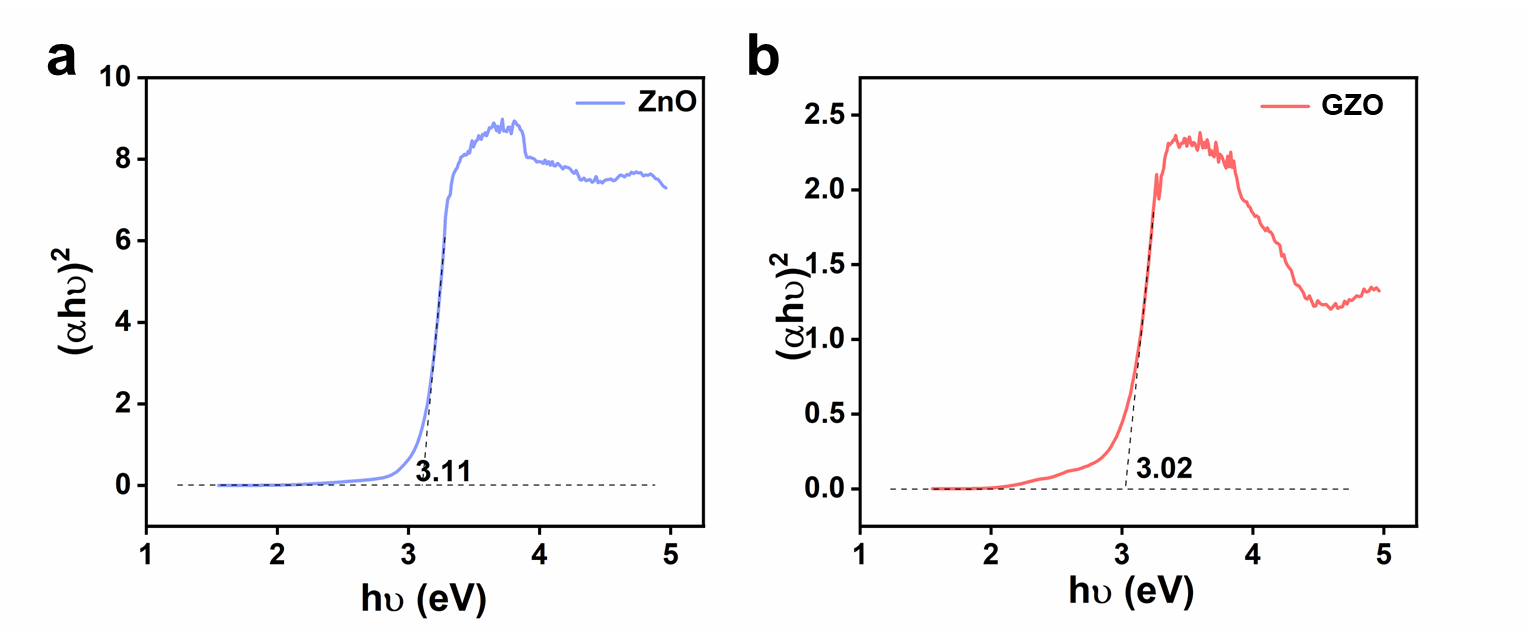


**Figure S12.** Solid-state UV–Vis diffuse reflectance spectra (UV–Vis DRS) and optical band gaps of (a) ZnO and (b) GZO.


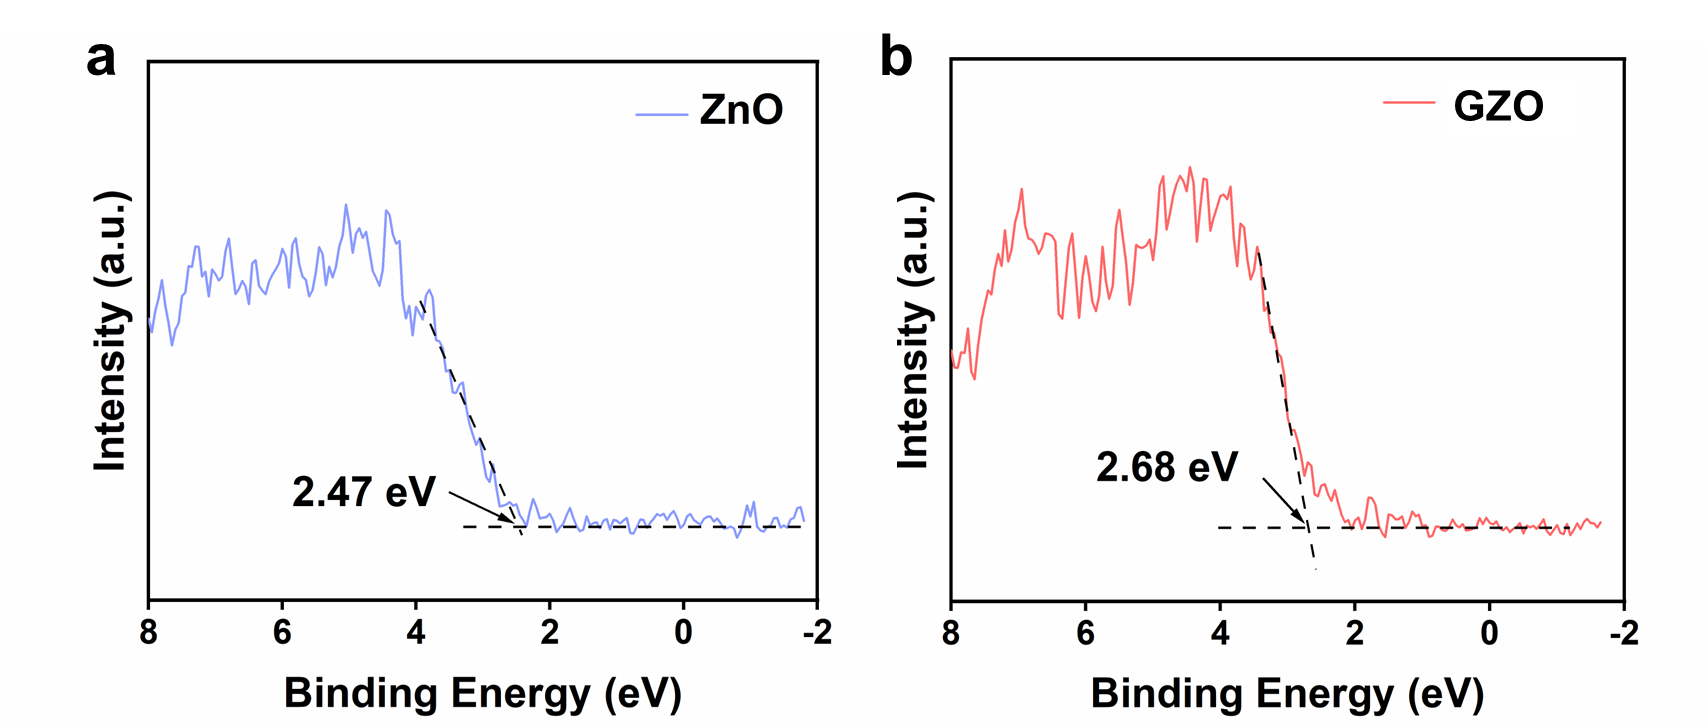


**Figure S13.** X-ray photoelectron spectroscopy (XPS) valence band spectra of (a) ZnO and (b) GZO.


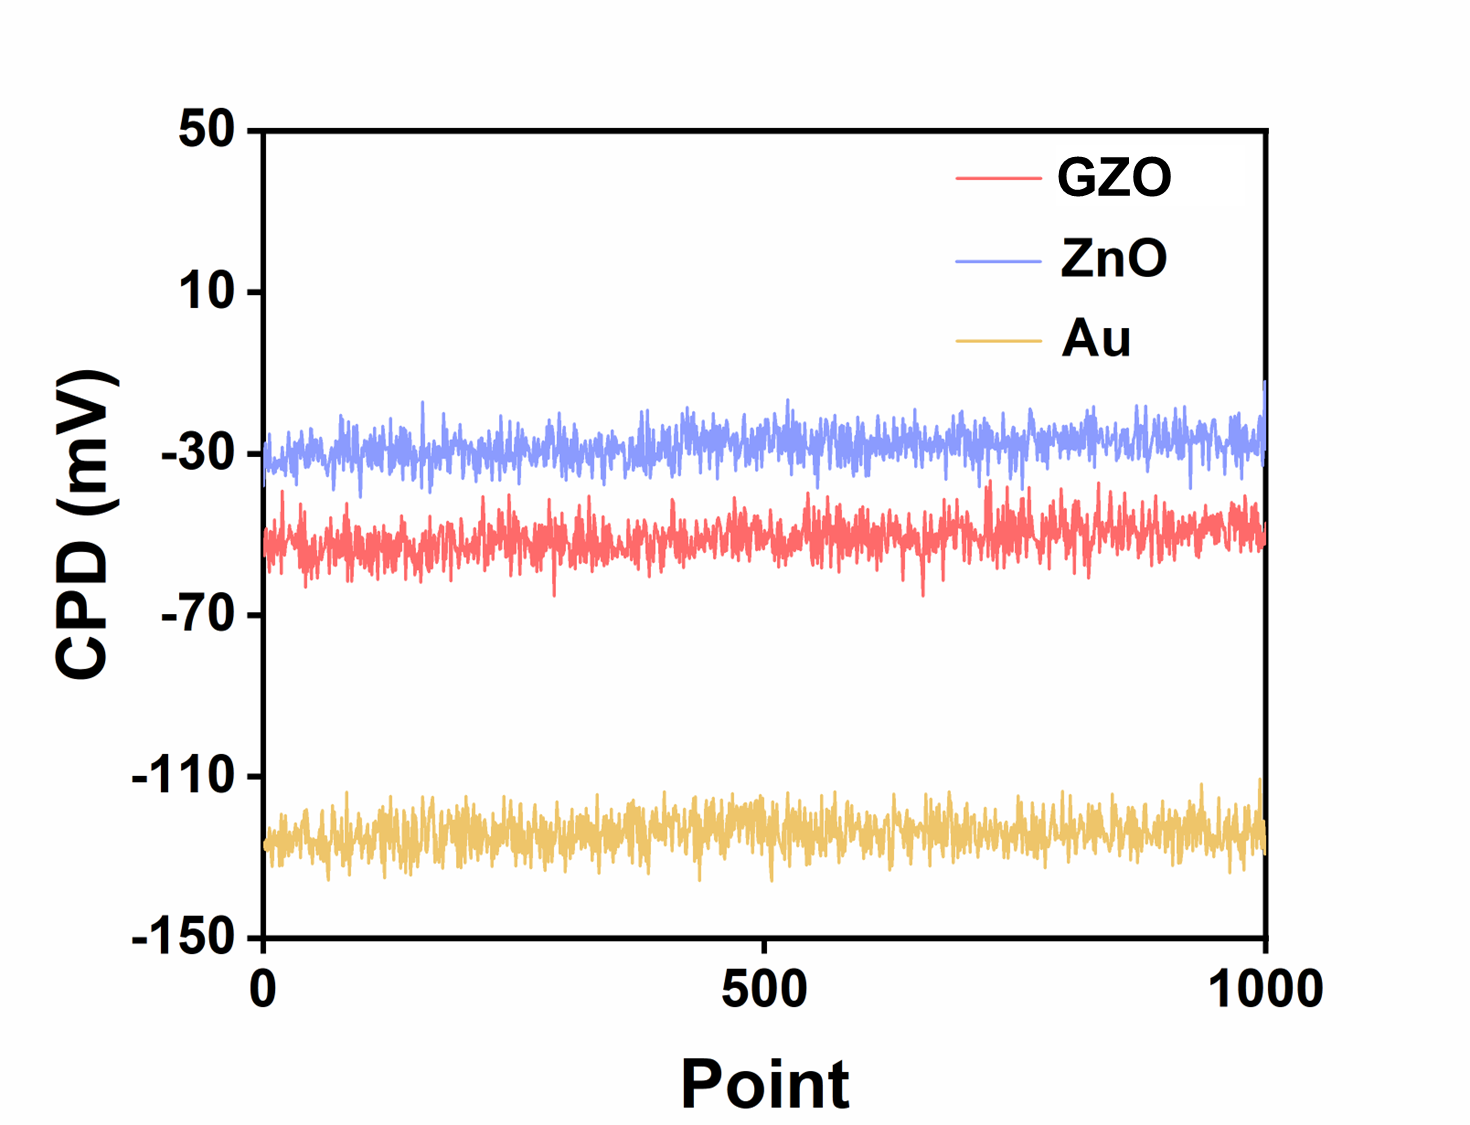


**Figure S14.** Work functions of Au, ZnO, and GZO measured by Kelvin probe (KP).


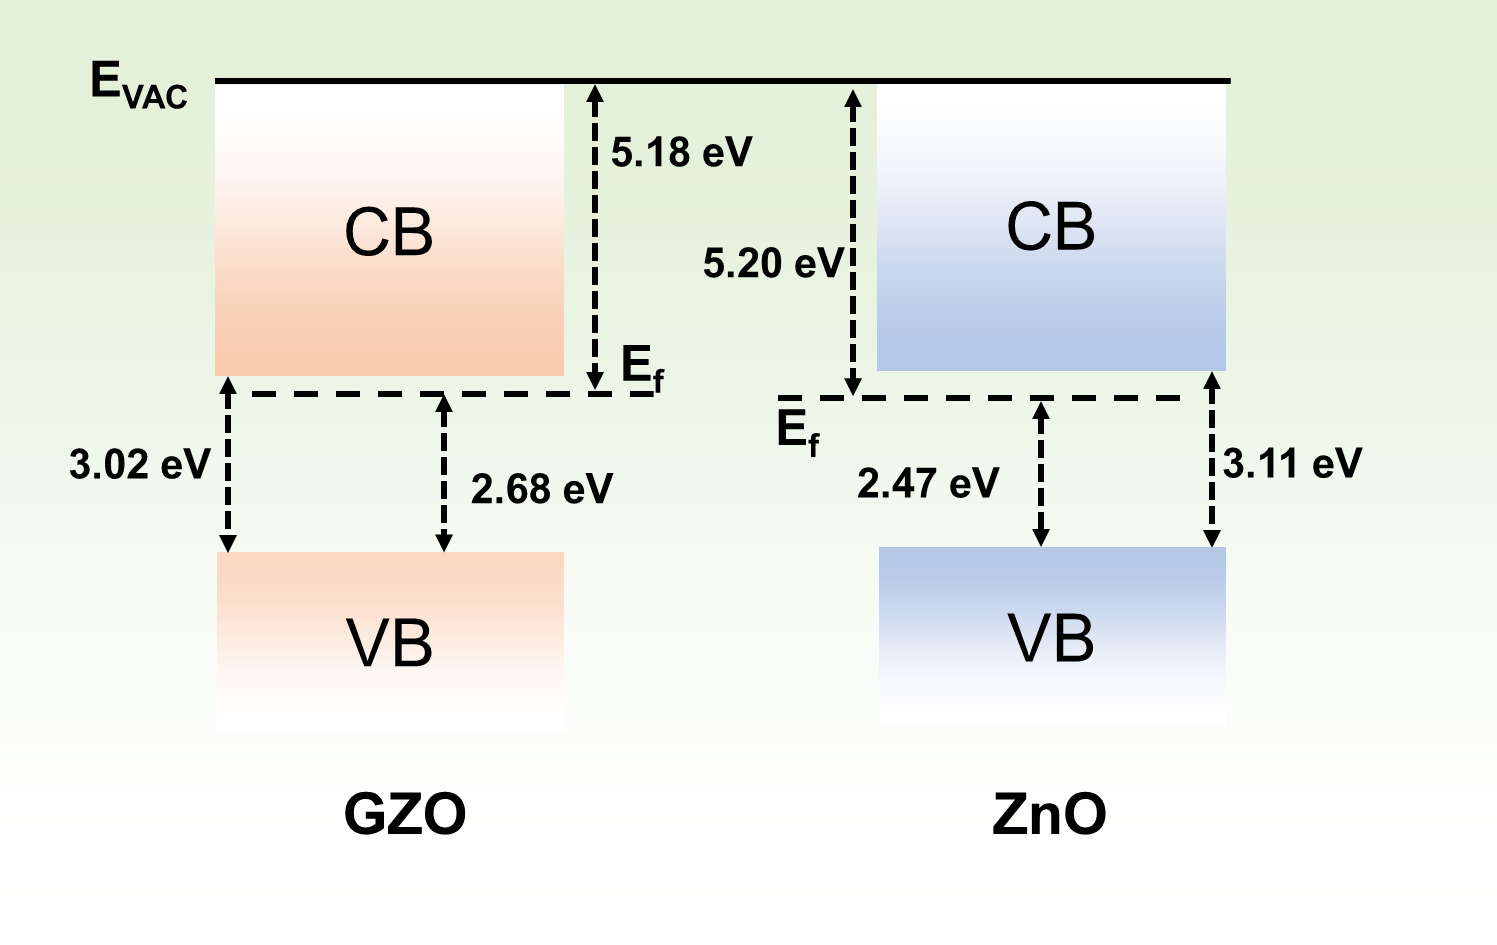


**Figure S15.** Schematic energy level diagrams of ZnO and GZO.


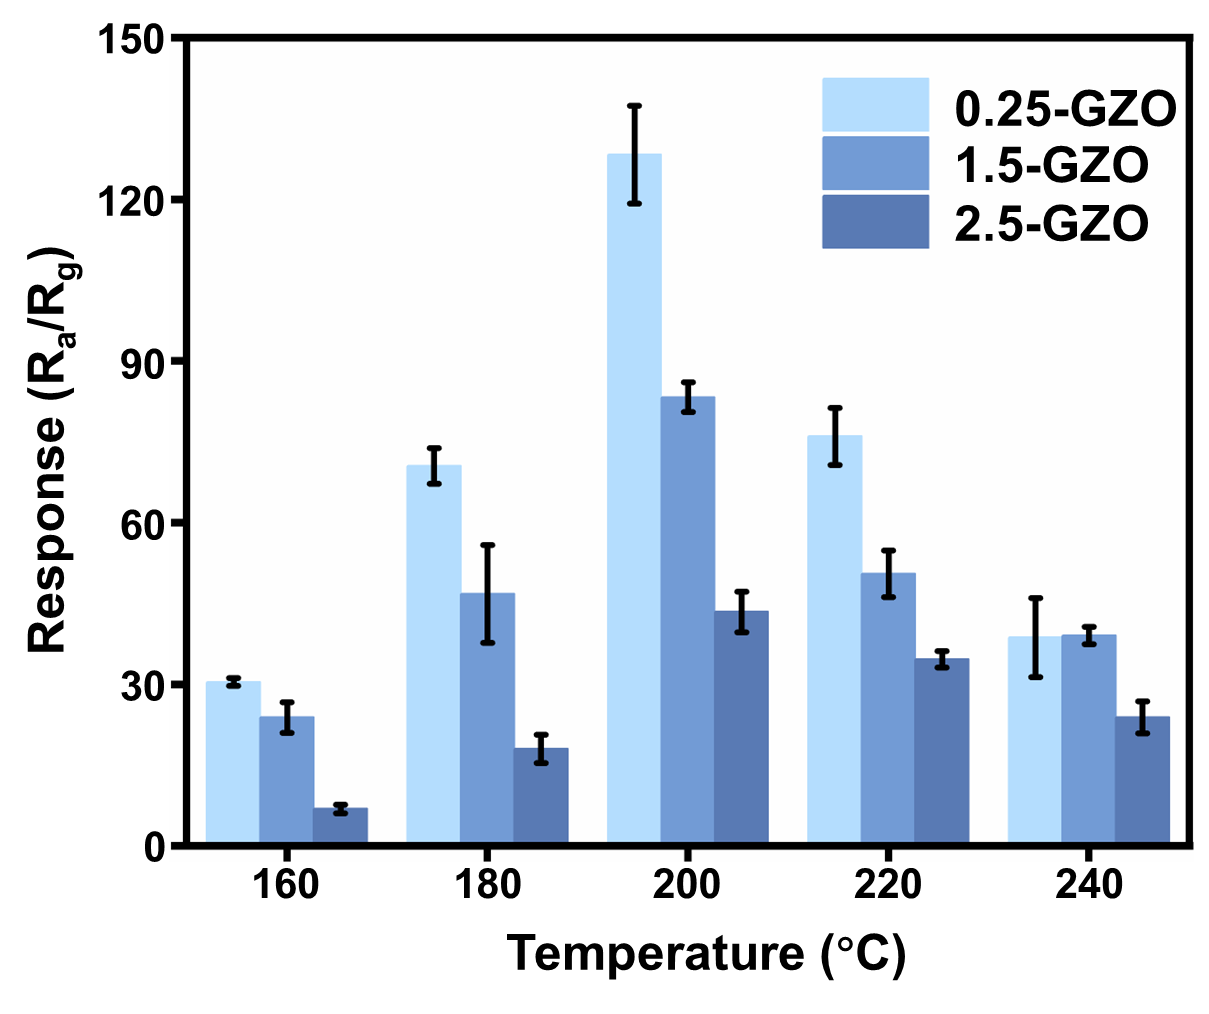


**Figure S16.** Response comparison of sensors with different Ga doping levels toward 100 ppm ethanol at various temperatures.


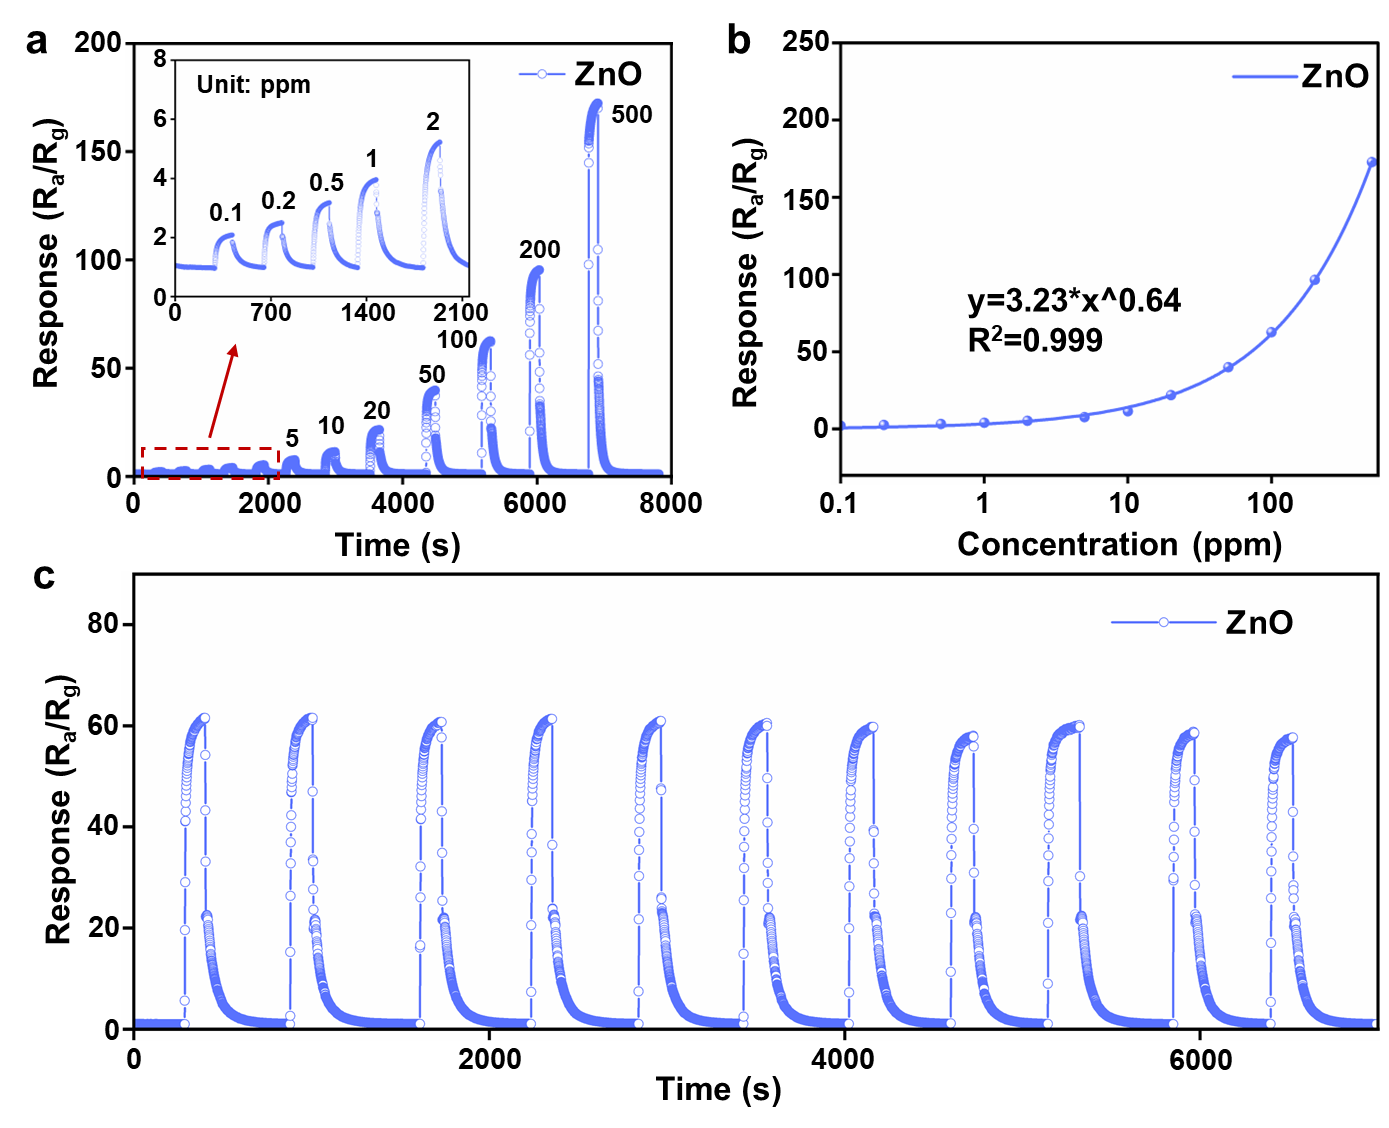


**Figure S17.** (a) Concentration dependence, (b) fitting curve, and (c) repeatability test for the pure ZnO sensor.


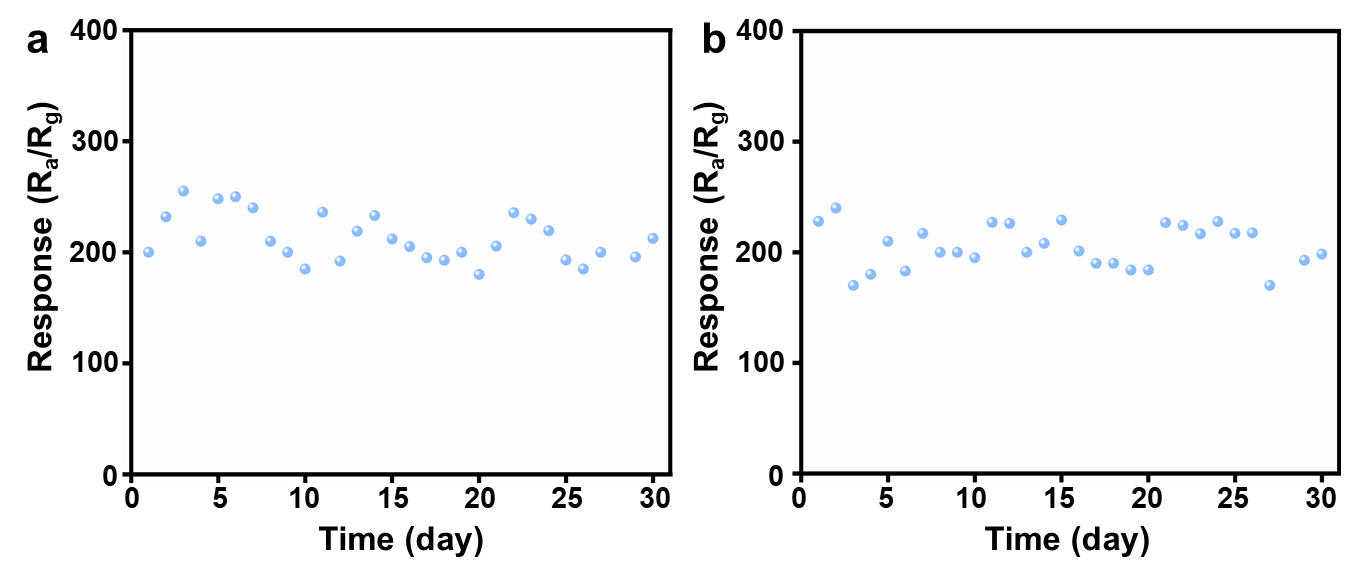


**Figure S18.** Trend of response values for two independent sensors during long-term stability testing.


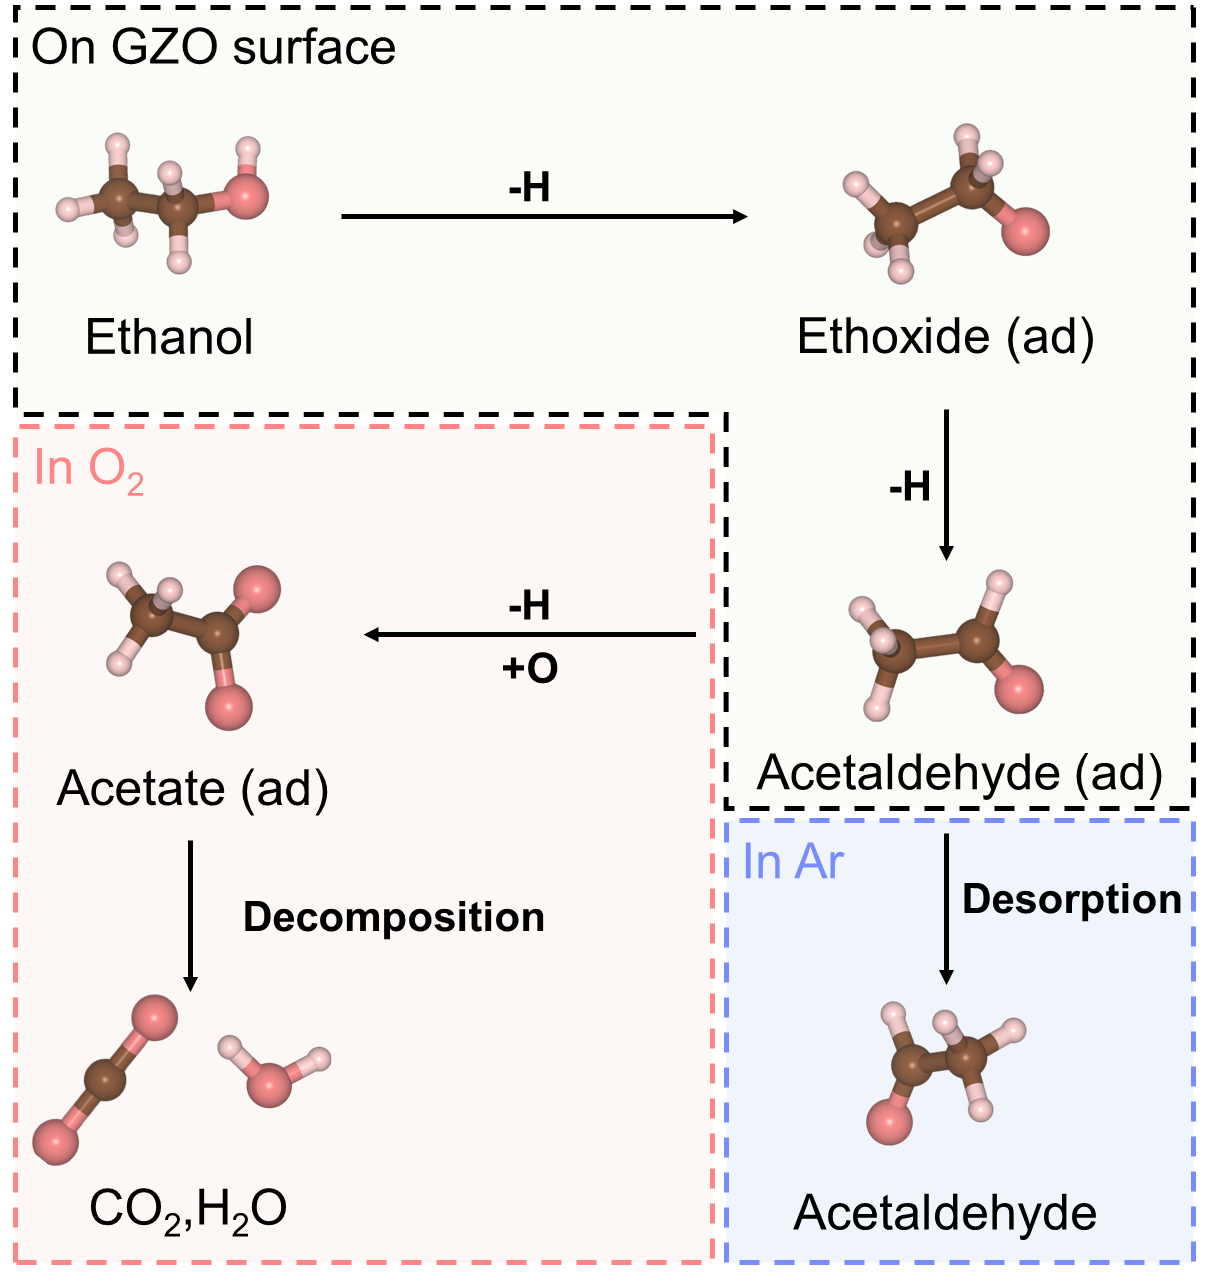


**Figure S19.** Schematic diagram of the stepwise oxidation decomposition pathway of ethanol on the GZO surface under different atmospheres.


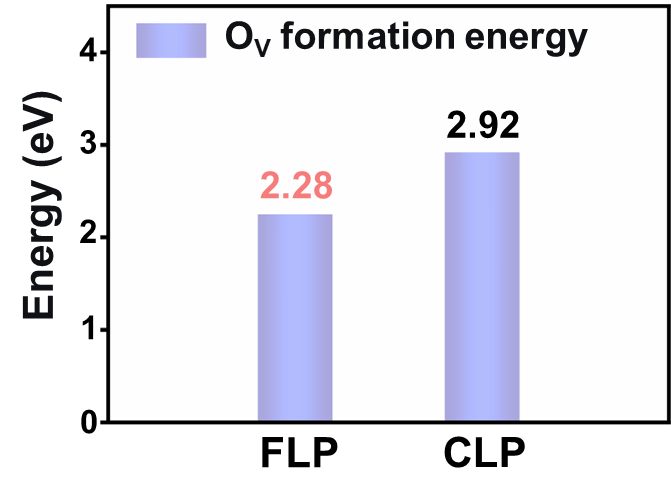


**Figure S20.** Formation energies of oxygen vacancies for different Ga-OV configurations calculated by DFT.


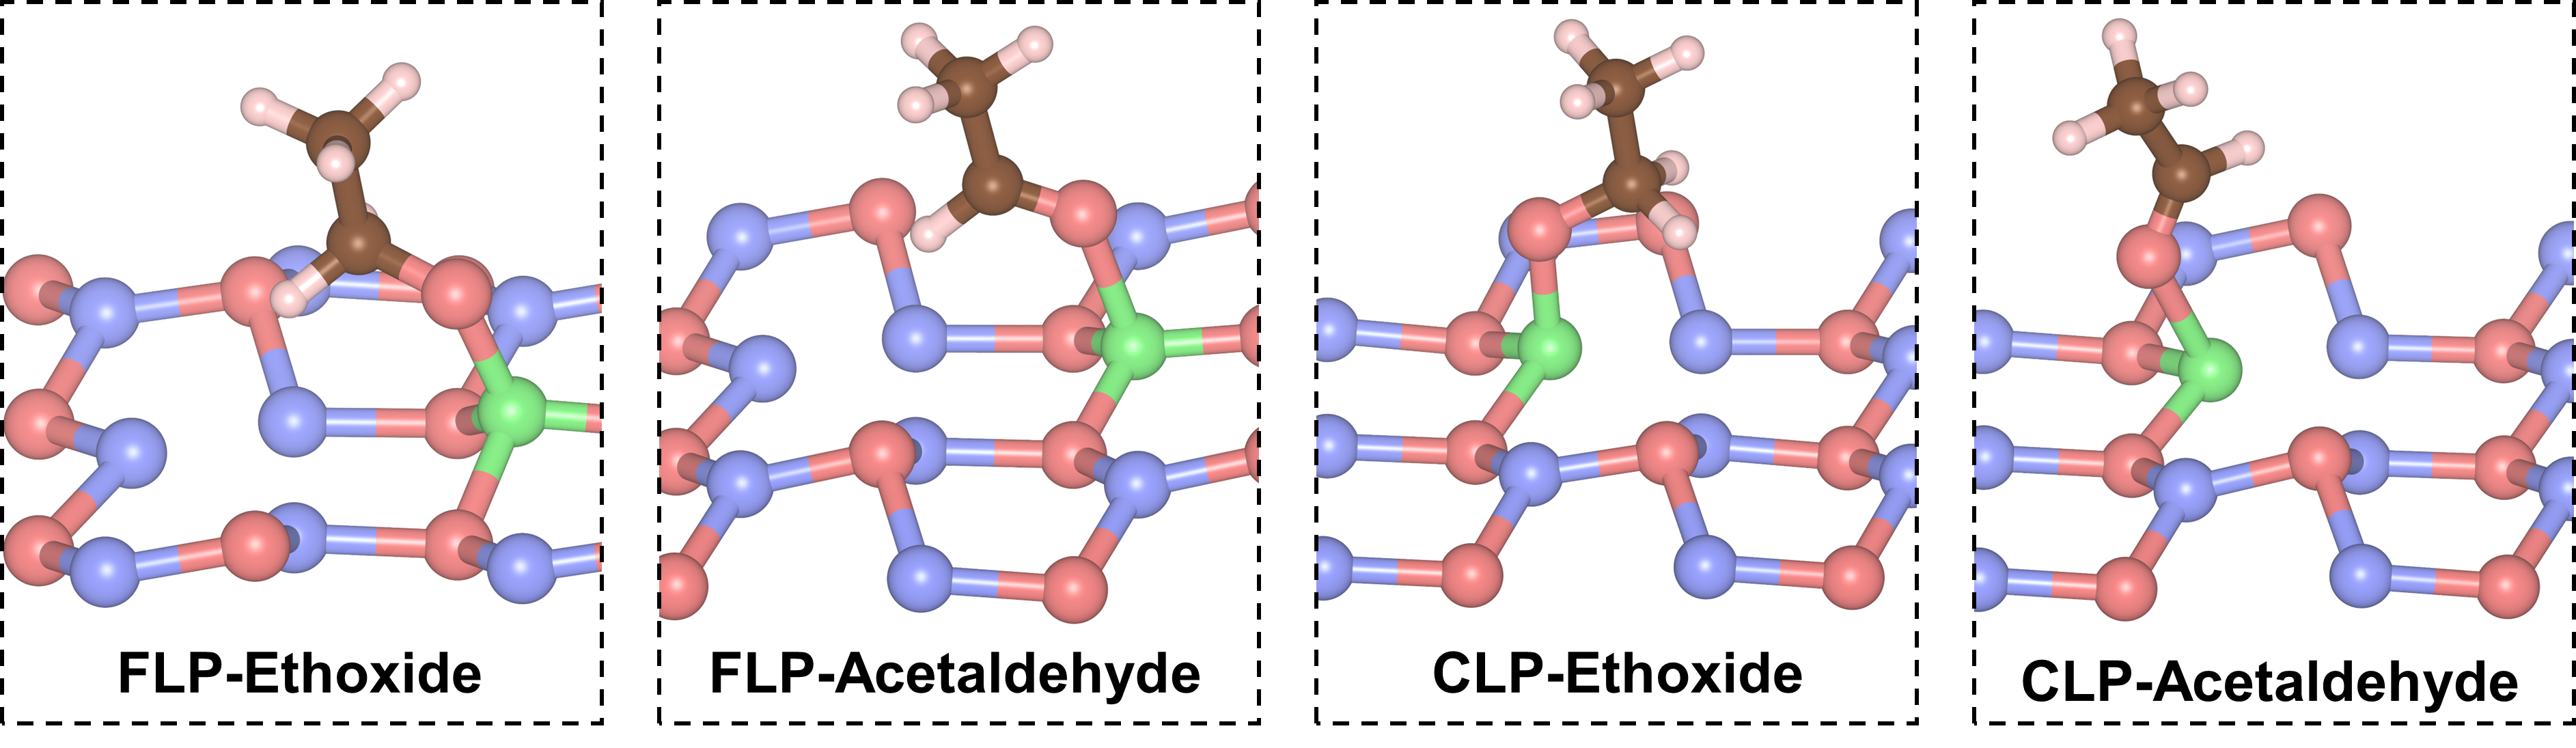


**Figure S21.** Views of adsorption models for ethoxy and acetaldehyde on the FLP and CLP surface.

**Supplementary Table 1.** The crystallographic information for ZnO and GZO according to the XRD profile fitting results.

| Chemical name | Zinc oxide | Gallium-doped zinc oxide |
| --- | --- | --- |
| Chemical formula | ZnO | Ga0.005Zn0.995O |
| Crystal system | Hexagonal | Hexagonal |
| Space group | P63mc | P63mc |
| Cell length a (Å) | 3.2498 | 3.2500 |
| Cell length b (Å) | 3.2498 | 3.2500 |
| Cell length c (Å) | 5.2077 | 5.2082 |
| Cell angle *α* (°) | 90.0 | 90.0 |
| Cell angle *β* (°) | 90.0 | 90.0 |
| Cell angle *γ* (°) | 120.0 | 120.0 |
| Cell size (Å3) | 47.63 | 47.64 |

**Supplementary Table 2.** EXAFS fitting results of ZnO and GZO.

| Sample | Shell | CN | R (Å) | σ2(Å2/103) | ΔE0(eV) | R-factor (%) |
| --- | --- | --- | --- | --- | --- | --- |
| Zn foil | Zn-Zn | 6* | 2.669±0.014 | 0.0102 | 2.709±2.279 | 1.76 |
| 2.888±0.014 | 0.0235 |
| ZnO | Zn-O | 3.20±0.36 | 1.965±0.019 | 0.0028 | 2.994±1.810 | 1.48 |
| Zn-Zn | 12* | 3.234±0.016 | 0.0100 |
| GZO | Zn-O | 2.88±0.18 | 1.952±0.020 | 0.0026 | 1.936±2.141 | 1.23 |
| Zn-Zn(Ga) | 12* | 3.231±0.015 | 0.0095 |

The EXAFS fitting was done over the region k = 2.75 - 10.30 Å-1 with 𝑆02 fixed at 0.84.
